# Supplementary material
Source: ML conference proceedings conference paper supplement (https://proceedings.neurips.cc/paper_files/paper/2013/hash/c45147dee729311ef5b5c3003946c48f-Abstract.html)
Supplement: Supplementary file [file c45147dee729311ef5b5c3003946c48f-Supplemental.zip]

---

# Appendix

---

## Chen-Ping Yu

Department of Computer Science  
Stony Brook University  
cheyu@cs.stonybrook.edu

## Wen-Yu Hua

Department of Statistics  
Pennsylvania State University  
wxh182@psu.edu

## Dimitris Samaras

Department of Computer Science  
Stony Brook University  
samaras@cs.stonybrook.edu

## Gregory J. Zelinsky

Department of Psychology  
Stony Brook University  
Gregory.Zelinsky@stonybrook.edu

## Abstract

Appendix for the details on Nelder-Mead algorithm, and the nonlinear least squares optimization method.

## 1 MLE using Nelder-Mead algorithm

Given a nondegenerate simplex  $S$  as the convex hull of vertices  $\{t_1, t_2, \dots, t_{n+1}\} \in \mathbb{R}^n$ , the Nelder-Mead method evaluates the objective function at each of the simplex vertices, the evaluation is denoted as  $f(t_i)$ ,  $i = 1, \dots, n+1$ ,  $f(t) = -\ln \mathcal{L}(t; \mathbf{x})$ . For each iteration, the algorithm consists of the following three steps [1]:

1. Order the evaluation values at each vertex, such that  $f(t_1) \leq f(t_2) \leq \dots \leq f(t_{n+1})$ .
2. Calculate the centroid of the best  $n$  points by  $c = \sum_{i=1}^n t_i$ .
3. Compute the new simplex by finding a new accepted point  $t'$  that leads to a better function evaluation. First, evaluate the *reflection* point  $f(t_r)$  with respect to  $c$ . Iteration terminates if  $f(t_1) \leq f(t_r) < f(t_n)$ . Else:
  - *Expand* if reflected point is the new best point, such that  $f(t_r) < f(t_1)$ .
  - *Contract* if the reflected point is the second worse point, such that  $f(x_n) \leq f(t_r)$ .
  - *Shrink* the new simplex toward current best point  $t_1$  if none of the above resulted in a better function evaluation, by replacing  $t_i$  with  $\frac{1}{2}(t_1 + t_i)$ , for  $i = 2, \dots, n+1$ .

The effect of this algorithm is better understood in the case of  $\mathbb{R}^2$ , that the simplex is a triangle that flip-flops (reflection, if necessary) its way down the hill in the likelihood function space until convergence. To enforce the bound constraints of  $\beta_{1,2} \geq 1$  and  $\pi \leq 1$  that involves just inequalities, the accepted point  $t'$  is adjusted with the respective lower and upper bound if any of its corresponding parameter values fail to satisfy the constraints.

## 2 Nonlinear least squares

For observations  $(x_1, y_1), \dots, (x_n, y_n)$  and our parameter vector  $\theta = (\alpha_1, \beta_1, c_1, \alpha_2, \beta_2, c_2, \pi)$ , the least squares estimator finds the minimizer to the following objective function:

$$F(\theta; \mathbf{x}) = \frac{1}{2} \sum_{i=1}^n r_i^2(\theta) \quad , \quad r_i(\theta) = \mathcal{W}^2(\theta; x_i) - y_i \quad (1)$$

where  $r_i(\theta)$  is the residual, and  $\theta$  is subject to the bound constraints that were specified earlier. The trust-region method iteratively minimizes the objective function starting from an initial starting parameter vector  $\theta'$ . By setting  $\theta = \theta'$ , we proceed to minimize a quadratic approximation  $Q(s)$  that is the change in the objective function  $F(\theta + s) - F(\theta)$ .  $Q(s)$  is given by:

$$Q(s) \equiv g^T s + \frac{1}{2} s^T H s, \quad \text{subject to } \|s\|_2 \leq \tau, \quad \frac{1}{\tau} - \frac{1}{\|s\|_2} = 0 \quad (2)$$

$s \in N$  is the subspace in the neighborhood  $N$  of the trust-region,  $g$  and  $H$  are the gradient and Hessian at  $\theta$ . The Steihaug-Toint conjugate-gradient method can be used for each iteration step  $s$  with the unconstrained Newton equation  $Hs = -g$ , setting  $\theta = \theta + s$  if  $F(\theta + s) < F(\theta)$  and adjusting  $\tau$  at the end of each iteration [2][3]. In our constrained case, the unconstrained Newton step is replaced with a scaled Newton step  $D^{-2}g = 0$  to solve for the following linear system:

$$M D s^N = -g', \quad M = D^{-1} H D^{-1} + \text{diag}(g) J^v \quad (3)$$

with  $g' = D^{-1}g$  at the  $k^{th}$  iteration, and  $D$  is the diagonal matrix of vector  $|v_k^{-1/2}|$ , with  $J^v$  denoting the Jacobian of  $|v|$ . The bound constraints ( $ub$ : upper-bound,  $lb$ : lower-bound) are used here for computing  $v(\theta)$ : for the  $i^{th}$  observation,  $v_i = \theta_i - ub_i$  if  $g_i < 0$  and  $ub_i < \infty$ ;  $v_i = \theta_i - lb_i$  if  $g_i \geq 0$  and  $lb_i > -\infty$ ;  $v_i = -1$  if  $g_i < 0$  and  $ub_i = \infty$ ; and  $v_i = 1$  if  $g_i \geq 0$  and  $lb_i = -\infty$ .

## References

- [1] J. Nocedal and S. Wright. Numerical optimization, series in operations research and financial engineering. *Springer, New York*, 2006.
- [2] T. Steihaug. The conjugate gradient method and trust regions in large scale optimization. *SIAM Journal on Numerical Analysis*, 1983.
- [3] P. L. Toint. Towards an efficient sparsity exploiting newton method for minimization. *Sparse Matrices and Their Uses*, 1981.
